# Supplementary material for: Empirical evaluation of the Q-Genie tool: a protocol for assessment of effectiveness
Source: PubMed Central journal article supplement — BMJ Open. 2016 Jun 9;6(6):e010403. doi: 10.1136/bmjopen-2015-010403 (PMC4908888; doi:10.1136/bmjopen-2015-010403), 2016-06-09
Supplement: bmjopen-2015-010403supp_table.pdf [file bmjopen-2015-010403supp_table.pdf]

**Supplementary Table 1**

| <b>Item</b> | <b>Risk of bias domain</b>                                                                                                       | <b>Question</b>                                                                                                                                                                                                           |
|-------------|----------------------------------------------------------------------------------------------------------------------------------|---------------------------------------------------------------------------------------------------------------------------------------------------------------------------------------------------------------------------|
| Question 1  | Selective reporting bias; publication bias                                                                                       | Rationale for study: Please rate the study on the adequacy of the presented hypothesis and rationale.                                                                                                                     |
| Question 2  | Bias from phenotype definition; measurement bias; information bias                                                               | Selection and definition of outcome of interest. The outcome can be cases/disease status or a quantitative trait: Please rate the study on the classification of the outcome (e.g. disease status or quantitative trait). |
| Question 3  | Selection bias (sampling bias)                                                                                                   | Selection and comparability of comparison groups (if applicable): Please rate the study on appropriateness of comparison groups (e.g. control groups).                                                                    |
| Question 4  | Information bias; misclassification bias (genotyping misclassification); measurement bias                                        | Technical classification of the exposure: Please rate the study on the technical classification of the genetic variant.                                                                                                   |
| Question 5  | Misclassification bias (non-genotyping); detection bias                                                                          | Non-technical classification of the exposure: Please rate the study on the non-technical classification of the genetic variant.                                                                                           |
| Question 6  |                                                                                                                                  | Other sources of bias: Please rate the study on the disclosure and discussion of sources of bias.                                                                                                                         |
| Question 7  | Bias from small sample size / inadequate power                                                                                   | Sample size and power: Please rate whether the study was adequately powered.                                                                                                                                              |
| Question 8  | Selective reporting bias; publication bias                                                                                       | A priori planning of analyses: Please rate the study on the planned analyses.                                                                                                                                             |
| Question 9  | Analysis reporting bias; bias from multiple testing; confounding bias; population stratification (confounding by ethnic origin); | Statistical methods and control for confounding: Please rate the study on statistical methods.                                                                                                                            |
| Question 10 | Bias from consanguinity / relatedness; sex and ethnicity discrepancies; bias from inappropriate selection of haplotype structure | Testing of assumptions and inferences for genetic analyses: Please rate the study on the description and test of all assumptions and inferences.                                                                          |

|                |                |                                                                                                                                                                               |
|----------------|----------------|-------------------------------------------------------------------------------------------------------------------------------------------------------------------------------|
| Question<br>11 | Reporting bias | Appropriateness of inferences drawn from results:<br>Please rate the study on whether conclusions drawn by the authors were supported by the results and appropriate methods. |
|----------------|----------------|-------------------------------------------------------------------------------------------------------------------------------------------------------------------------------|
